# Supplementary material
Source: Royal Society of Chemistry journal article supplement (doi:10.1039/d5ta08384b)
Supplement: d5ta08384b1.pdf [file d5ta08384b1.pdf]

## Supplementary Information

### Investigating Ti-Nb alloys as supports for iridium oxide water oxidation electrocatalysts

Guangmeimei Yang<sup>a,b</sup>, Wei Huang<sup>c</sup>, Yifeng Wang<sup>b</sup>, Caiwu Liang<sup>a,b</sup>, Yuxiang Zhou<sup>b</sup>, Santosh Kumar<sup>d</sup>, Pilar Ferrer Escorihuela<sup>d</sup>, Parnia Navabpour<sup>e</sup>, Giuseppe Sanzone<sup>e</sup>, Trevor Ferris<sup>a</sup>, Mark Turner<sup>f</sup>, Sarah J. Haigh<sup>f</sup>, Georg Held<sup>d</sup>, Caterina Ducati<sup>c</sup>, Andreas Kafizas<sup>a,g,†</sup>  
and Reshma R. Rao<sup>b,h,†</sup>

- a) Department of Chemistry, Molecular Science Research Hub, Imperial College London, White City, W12 0BZ, London, UK
- b) Department of Materials, Imperial College London, South Kensington, SW7 2AZ, London, UK
- c) Department of Materials Science and Metallurgy, University of Cambridge, CB3 0FS, Cambridge, UK
- d) B07, Diamond Light Source, Harwell Science and Innovation Campus, Didcot OX11 0DE, UK
- e) Teer Coatings Ltd, West Stone, West Stone House, Droitwich WR9 9AS, UK
- f) Department of Materials, The University of Manchester, M13 9PL, Manchester, UK
- g) London Centre for Nanotechnology, Imperial College London, UK
- h) Grantham Institute – Climate Change and the Environment, Imperial College London, UK

<sup>†</sup>Corresponding authors: Dr Andreas Kafizas [a.kafizas@imperial.ac.uk](mailto:a.kafizas@imperial.ac.uk); Dr Reshma R. Rao [reshma.rao@imperial.ac.uk](mailto:reshma.rao@imperial.ac.uk)

#### Electrochemistry workflow

A rotating disc electrode (RDE) was used in this study to examine the activities of Ti-Nb supported IrO<sub>x</sub>. All experiments were carried out using 0.1 M HClO<sub>4</sub> as the electrolyte. Electrochemical workflow: Chronoamperometry (CA) was firstly carried out by holding the potential at 1.6 V<sub>RHE</sub> for 1 hour. The current was recorded after being stabilised for activity comparison. The accelerated stress test (AST) was conducted subsequently by cycling in a potential window from 1.2 V<sub>RHE</sub> to 1.7 V<sub>RHE</sub> for 3,000 cycles (as shown in **Figure S1**). The electrolyte was taken out twice before and after the AST for measuring the metal dissolution.

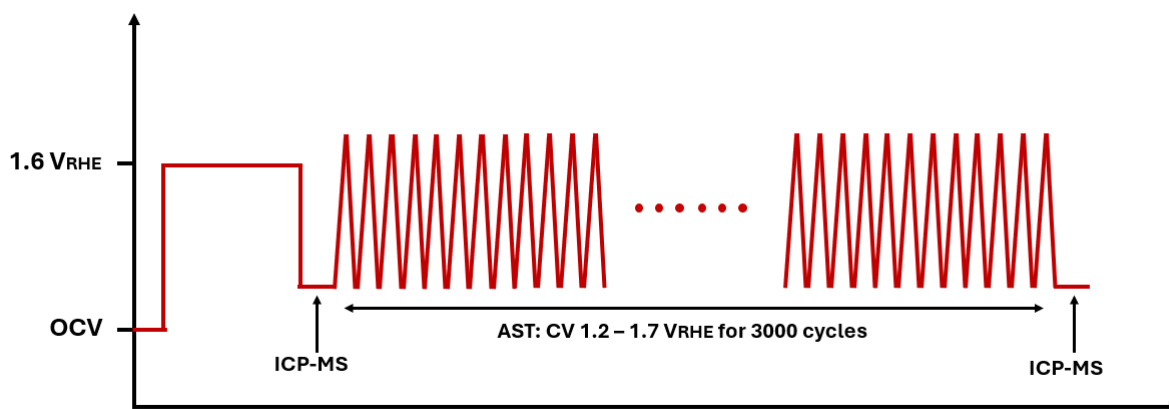

**Figure S1.** Demonstration of the electrochemistry workflow for the Ti-Nb samples.

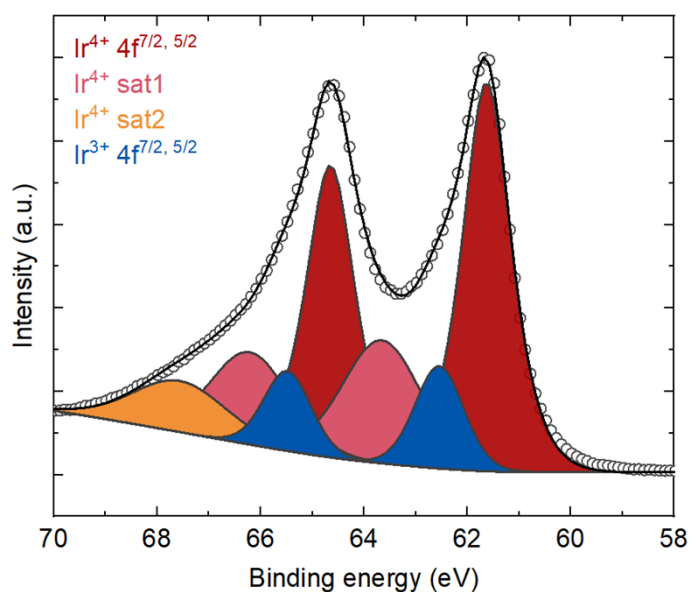

**Figure S2.** Ir 4f XPS spectrum with fitted components for different Ir oxidation states. The ratio between Ir<sup>4+</sup> to Ir<sup>3+</sup> is approximately 79% to 21%.

100 nm thick Ti-Nb thin films with varied Nb content were sputtered onto glassy carbon stubs shown in **Figure S3a** using physical vapour deposition under Ar (**Figure S3b**). **Table S1** summarises the sputter conditions.

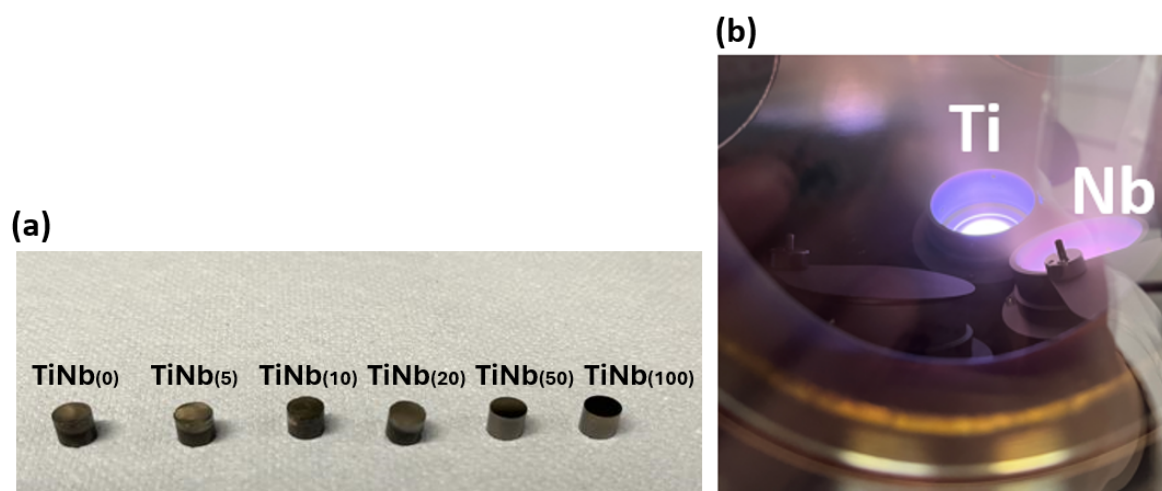

**Figure S3.** (a) Photograph of a series of TiNb<sub>(x)</sub> (x = 0, 5, 10, 20, 50 and 100) samples on glassy carbon substrate (RDE stub) synthesised using a sputter deposition method. (b) Photograph of the co-sputtering of the Ti-Nb samples in an ultra-high vacuum chamber.

**Table S1.** Nb content of the as-sputtered samples obtained by XPS and the parameters used for the sputter deposition (DC: direct current; RF: radio frequency)

|         | Nb (at%)<br>(determined by XPS) | Ti growth rate<br>(Å/s) | Nb growth rate<br>(Å/s) | Coating time (s) |
|---------|---------------------------------|-------------------------|-------------------------|------------------|
| TiNb(0) | -                               | 0.77 (150 W DC)         | -                       | 1299             |
| TiNb(5) | 3.2                             | 0.77 (150 W DC)         | 0.045 (20 W RF)         | 1227             |

|           |      |                 |                 |        |
|-----------|------|-----------------|-----------------|--------|
| TiNb(10)  | 10.1 | 0.77 (150 W DC) | 0.088 (30 W RF) | 1166   |
| TiNb(20)  | 15.3 | 0.77 (150 W DC) | 0.19 (45 W RF)  | 1042   |
| TiNb(50)  | 52.7 | 0.49 (100 W DC) | 0.49 (100 W RF) | 1020.5 |
| TiNb(100) | -    | -               | 0.49 (100 W RF) | 2041   |

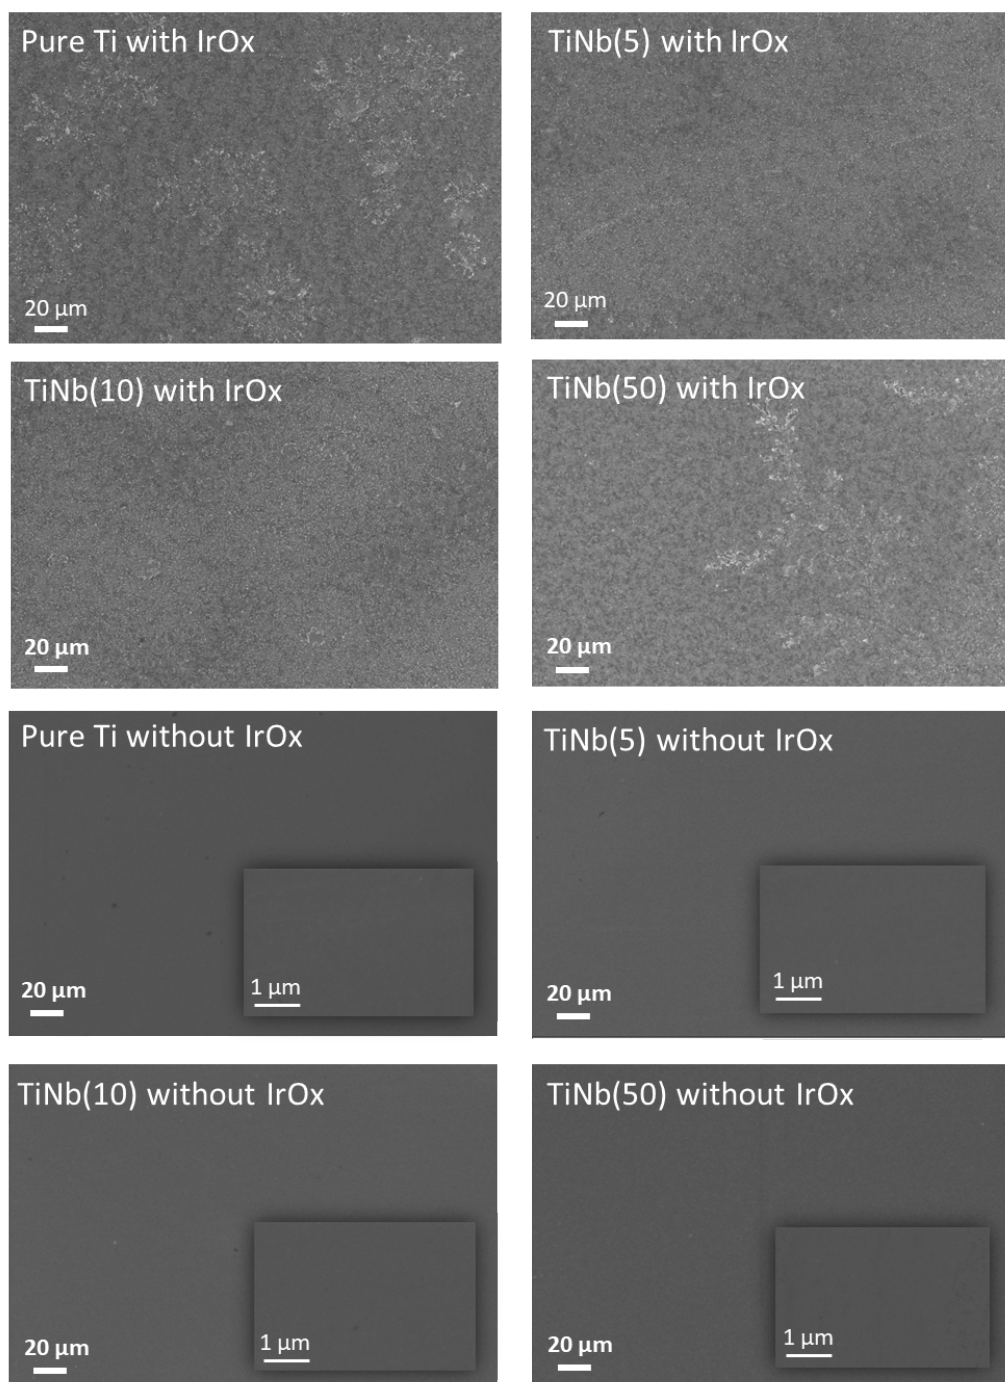

**Figure S4.** SEM images at 1,000 and 50,000 times magnification showing the TiNb<sub>(x)</sub> (x = 0, 5, 10 and 50) supports before and after deposition of the IrO<sub>x</sub>-based ink using drop casting.

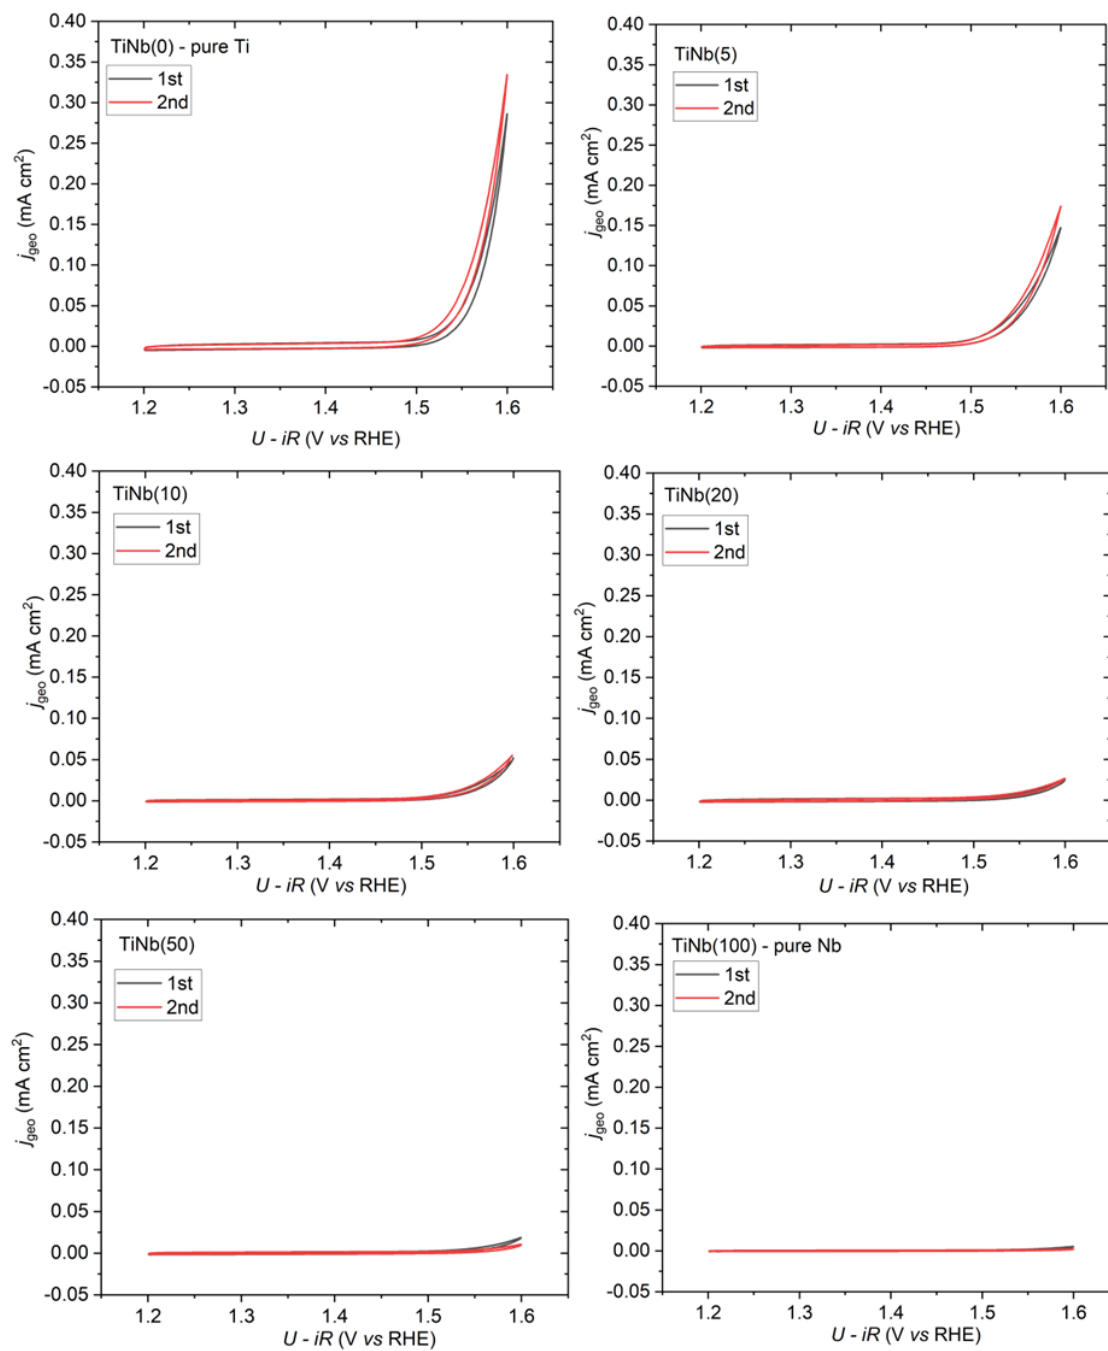

**Figure S5.** Cyclic Voltammograms comparing the electrochemical water oxidation activity of two independently synthesised samples that contain  $\text{IrO}_x$  supported on  $\text{TiNb}_{(x)}$  ( $x = 0, 5, 10, 20, 50$  and  $100$ ) on glassy carbon ( $1.2 - 1.6 \text{ V}_{\text{RHE}}$ ,  $20 \text{ mV/s}$ ,  $0.1 \text{ M HClO}_4$ ,  $1600 \text{ rpm}$ ).

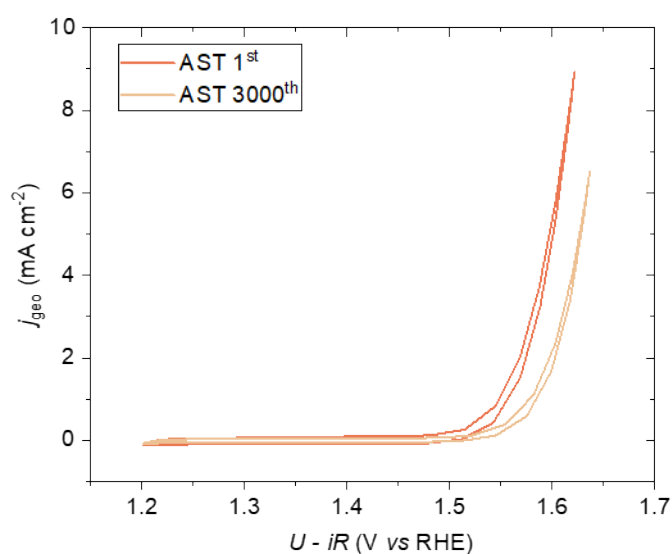

**Figure S6.** Initial activity of IrO<sub>x</sub> supported on a polycrystalline gold disk and the activity after the AST, where the sample was cycled between 1.2 and 1.7 V<sub>RHE</sub> at 50 mV/s in 0.1 M HClO<sub>4</sub> (pH ~1.1).

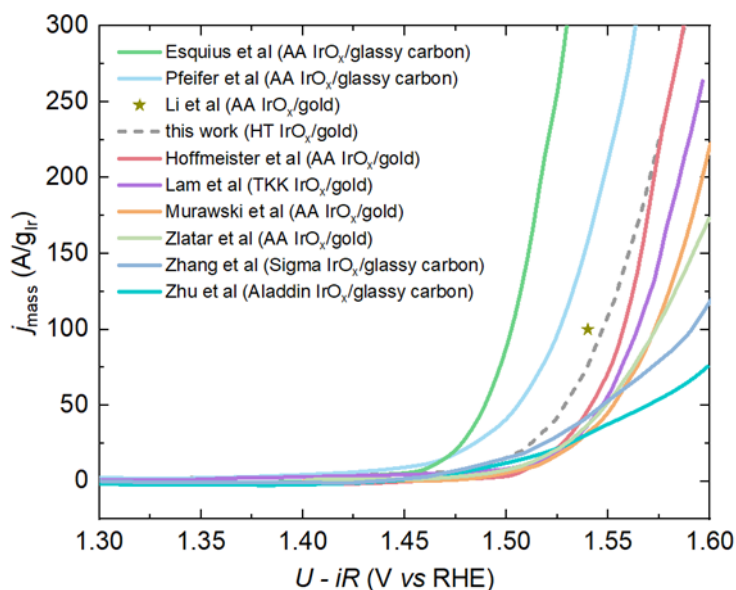

**Figure S7.** Comparison of the mass-normalised electrochemical water oxidation activity between this work (dotted line) and published literature (coloured lines).<sup>1-9</sup>

**Table S2.** Experimental conditions of reported IrO<sub>x</sub> activities shown in **Figure S7**.

| References                                                        | Substrate            | Electrolyte                          | Type of IrO <sub>x</sub>         |
|-------------------------------------------------------------------|----------------------|--------------------------------------|----------------------------------|
| Esquius et al, <i>ACS Appl. Energy Mater.</i> , 2020 <sup>6</sup> | Glassy carbon        | 0.1 M HClO <sub>4</sub>              | Alfa Aesar (AA) IrO <sub>x</sub> |
| Pfeifer et al, <i>Phys. Chem. Chem. Phys.</i> , 2016 <sup>7</sup> | Glassy carbon        | 0.5 M H <sub>2</sub> SO <sub>4</sub> | Alfa Aesar (AA) IrO <sub>x</sub> |
| Li et al. <i>J. Am. Chem. Soc.</i> 2025 <sup>2</sup>              | Polycrystalline gold | 0.1 M HClO <sub>4</sub>              | Alfa Aesar (AA) IrO <sub>x</sub> |
| This work                                                         | Polycrystalline gold | 0.1 M HClO <sub>4</sub>              | Hydrothermal IrO <sub>x</sub>    |
| Hoffmeister et al, <i>Adv. Sci.</i> ,                             | Polycrystalline gold | 0.1 M HClO <sub>4</sub>              | Alfa Aesar (AA) IrO <sub>x</sub> |

| 2024 <sup>8</sup>                                                        |                                      |                                      |                                               |
|--------------------------------------------------------------------------|--------------------------------------|--------------------------------------|-----------------------------------------------|
| Lam et al, <i>ACS Catal.</i> , 2025 <sup>5</sup>                         | Polycrystalline gold                 | 0.1 M HClO <sub>4</sub>              | Tanaka Kikinzoku Kogyo (TKK) IrO <sub>x</sub> |
| Murawski et al, <i>Johnson Matthey Technol. Rev.</i> , 2024 <sup>3</sup> | Polycrystalline gold                 | 0.1 M HClO <sub>4</sub>              | Alfa Aesar (AA) IrO <sub>x</sub>              |
| Zlatar et al. <i>ACS Catal.</i> , 2023 <sup>9</sup>                      | Polycrystalline gold & Glassy carbon | 0.1 M HClO <sub>4</sub>              | Alfa Aesar (AA) IrO <sub>x</sub>              |
| Zhang et al. <i>Angew. Chem. Int. Ed.</i> , 2025 <sup>1</sup>            | Glassy carbon                        | 0.5 M H <sub>2</sub> SO <sub>4</sub> | Sigma Aldrich IrO <sub>2</sub>                |
| Zhu et al, <i>Nat. Comm.</i> , 2023 <sup>4</sup>                         | Glassy carbon                        | 0.5 M H <sub>2</sub> SO <sub>4</sub> | Aladdin IrO <sub>x</sub>                      |

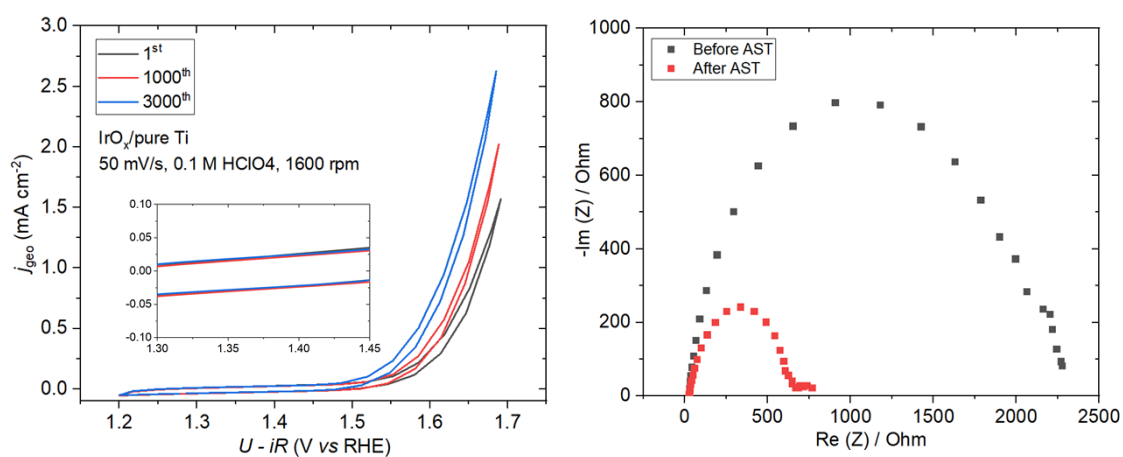

**Figure S8.** Cyclic voltammogram (**left**) of IrO<sub>x</sub> supported onto TiNb(0) – pure Ti support during the AST. Cycle1, cycle 1000 and cycle 3000 are coplotted. EIS (**right**) before and after the AST.

**Table S3.** Calculation of Ti/Nb dissolution during AST (based on ICP-MS measurements)

NOTE: Surface area of RDE stub 0.196 cm<sup>2</sup>; Density of Ti metal: 4.5 g/cm<sup>3</sup>, 8.82 × 10<sup>-8</sup> g/nm; Density of Nb metal: 8.6 g/cm<sup>3</sup>, 1.68 × 10<sup>-7</sup> g/nm

| Nb at% | Ti dissolved (μg) | Nb dissolved (μg) | Ti dissolved (nm) | Nb dissolved (nm) |
|--------|-------------------|-------------------|-------------------|-------------------|
| 0      | 0.0496            | -                 | 0.56              | -                 |
| 5      | 0.045             | 0.0135            | 0.50              | 0.08              |
| 10     | 0.032             | 0.016             | 0.36              | 0.095             |
| 100    | -                 | 0.057             |                   | 0.34              |

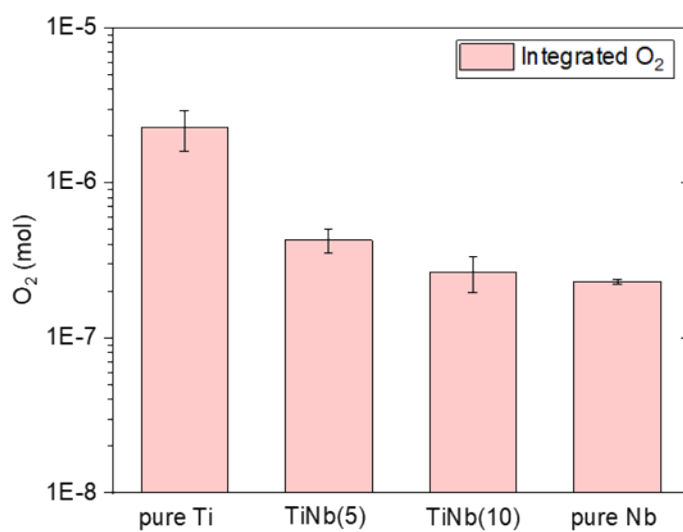

**Figure S9.** Integrated oxygen produced during the ASTs by integrated charges of CV scans assuming a 100% Faradaic efficiency.

**Figure S10. (a)** dissolved metals during the AST (RDE, 1.2 – 1.7 V<sub>RHE</sub>, 100 mV/s, 3000 cycles, 0.1 M HClO<sub>4</sub>, 1600 rpm). **(b)** S-numbers of dissolved metals (Ti, Nb and Ir) during the AST.

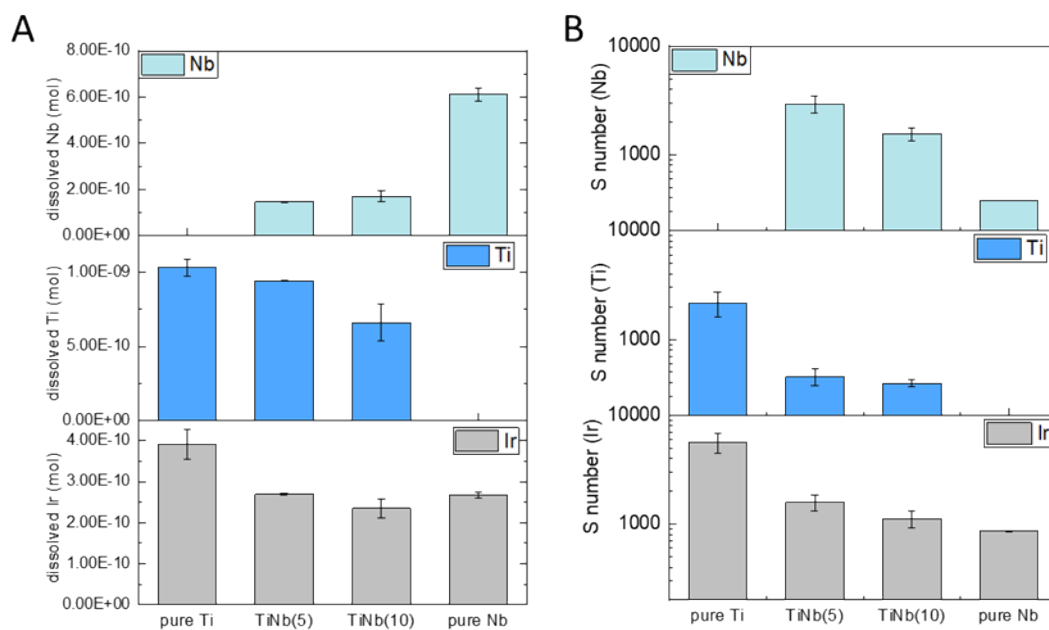

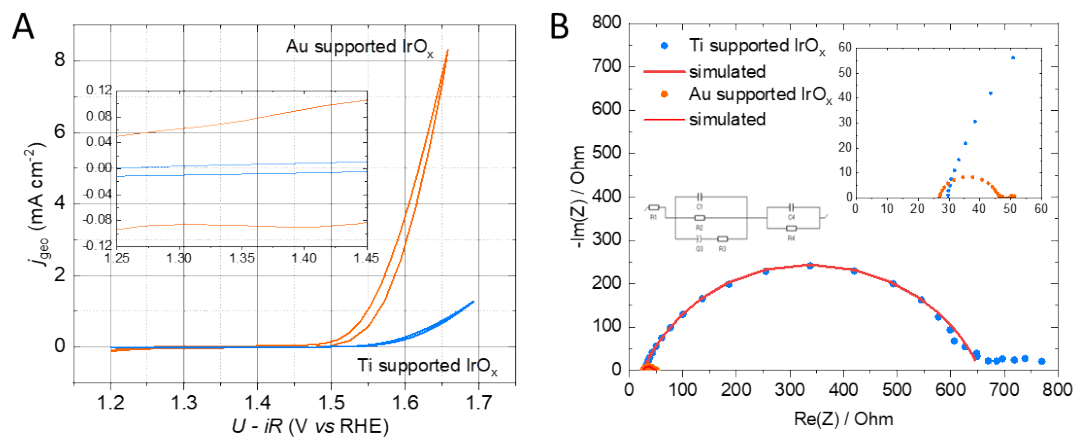

**Figure S11. (a)** CVs Ti supported and Au supported IrO<sub>x</sub> (RDE, 20 mV/s, 0.1 M HClO<sub>4</sub>, 1600 rpm). Inset is a close-up at the non-Faradaic region. **(b)** EIS of Ti supported and Au supported IrO<sub>x</sub> at 1.6 V<sub>RHE</sub>.

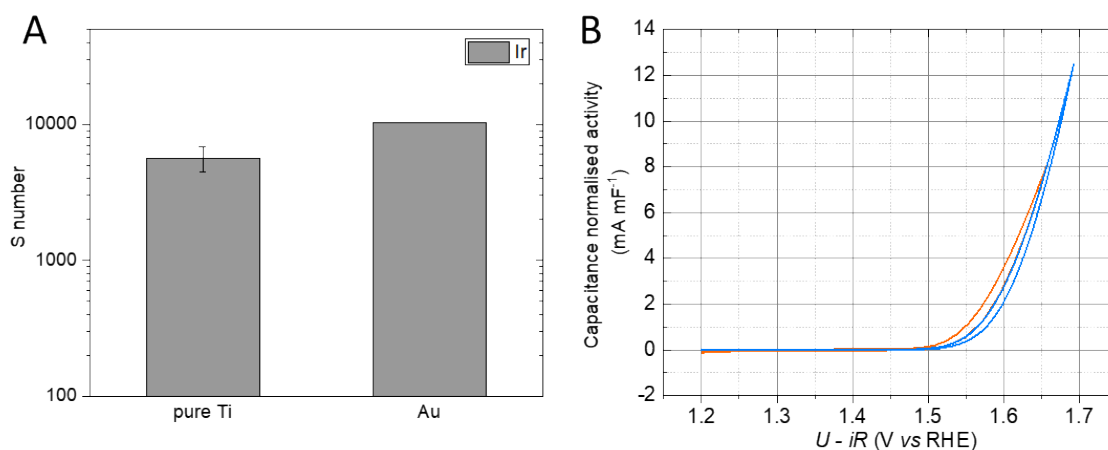

**Figure S12. (a)** S-numbers of Ti supported and Au supported IrO<sub>x</sub>. S-numbers derived from the AST tests (RDE, 1.2 – 1.7 V<sub>RHE</sub>, 100 mV/s, 3000 cycles, 0.1 M HClO<sub>4</sub>, 1600 rpm). **(b)** Capacitance normalised activity (absolute current divided by double layer capacitance) of Ti supported and Au supported IrO<sub>x</sub>.

**Table S4.** XPS fitting parameters (Ti 2p<sub>3/2</sub> and 2p<sub>1/2</sub>). FWHM: full width half maximum

| Sample name               | Line shape         | Binding energy (eV) | FWHM      |
|---------------------------|--------------------|---------------------|-----------|
| TiNb(0) Ti <sup>0</sup>   | A(0.4,0.4,0)GL(30) | (453.8, 454.1)      | (0.9,1.8) |
| TiNb(0) Ti <sup>4+</sup>  | GL(30)             | (459.5,459)         | (0.9,1.8) |
| TiNb(50) Ti <sup>0</sup>  | A(0.4,0.4,0)GL(30) | (454.1,453.8)       | (0.9,1.8) |
| TiNb(50) Ti <sup>2+</sup> | GL(30)             | (456,455.5)         | (0.9,1.8) |
| TiNb(50) Ti <sup>3+</sup> | GL(30)             | (457.6,457.3)       | (0.9,1.8) |
| TiNb(50) Ti <sup>4+</sup> | GL(30)             | (459,459.5)         | (0.9,1.8) |

**Table S5.** XPS fitting parameters (Nb 3d<sub>5/2</sub> and 3d<sub>3/2</sub>). FWHM: full width half maximum

| Sample name              | Line shape         | Binding energy (eV) | FWHM       |
|--------------------------|--------------------|---------------------|------------|
| TiNb(0) Nb <sup>0</sup>  | A(0.4,0.4,0)GL(70) | (202.5, 202)        | (0.6, 1.8) |
| TiNb(0) Nb <sup>2+</sup> | GL(30)             | (203.8, 203.2)      | (0.6,1.8)  |

|                          |                    |                |            |
|--------------------------|--------------------|----------------|------------|
| TiNb(O) Nb <sup>4+</sup> | GL(30)             | (206.6, 206)   | (0.6,1.8)  |
| TiNb(O) Nb <sup>5+</sup> | GL(30)             | (207.9, 207.3) | (0.6,1.8)  |
| TiNb(O) Nb <sup>0</sup>  | A(0.4,0.4,0)GL(70) | (202.5, 202)   | (0.6, 1.8) |
| TiNb(O) Nb <sup>4+</sup> | GL(30)             | (206.6, 206)   | (0.6,1.8)  |
| TiNb(O) Nb <sup>5+</sup> | GL(30)             | (207.9, 207.3) | (0.6,1.8)  |

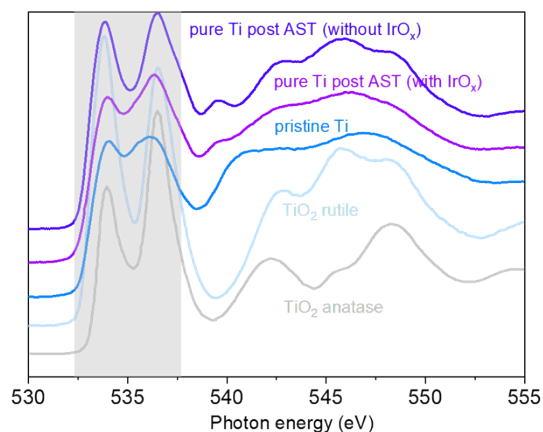

**Figure S13.** NEXAFS of the O K-edge of pure Ti support samples (pristine, post AST with IrO<sub>x</sub> catalyst and without IrO<sub>x</sub>).

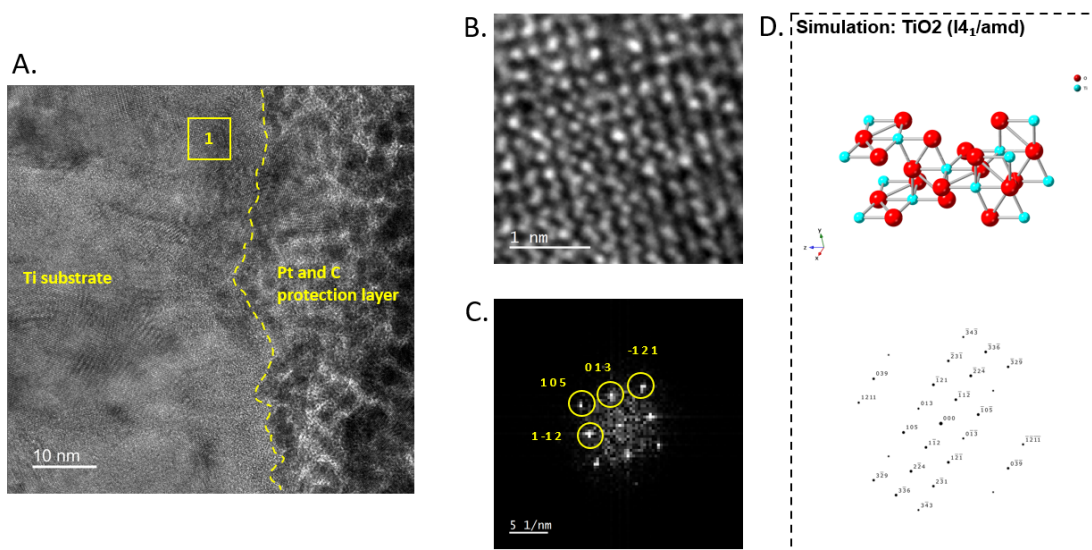

**Figure S14.** Transmission electron microscopy (TEM) characterisation of a focused ion beam (FIB) milled cross sectional specimen of the pure Ti after the AST tested with IrO<sub>x</sub>. **(a)** TEM image where the left of the image is the Pt and C strap used to protect the surface of the Ti during FIB sample preparation. **(b)** Atomic lattice information from the yellow box region (1) in (a). **(c)** The Fourier transform of (b), where the spots are indexed to the anatase TiO<sub>2</sub> phase. **(d)** Crystallmaker atomic structure model and simulated diffraction pattern for the anatase TiO<sub>2</sub> phase (*I4<sub>1</sub>/amd*).

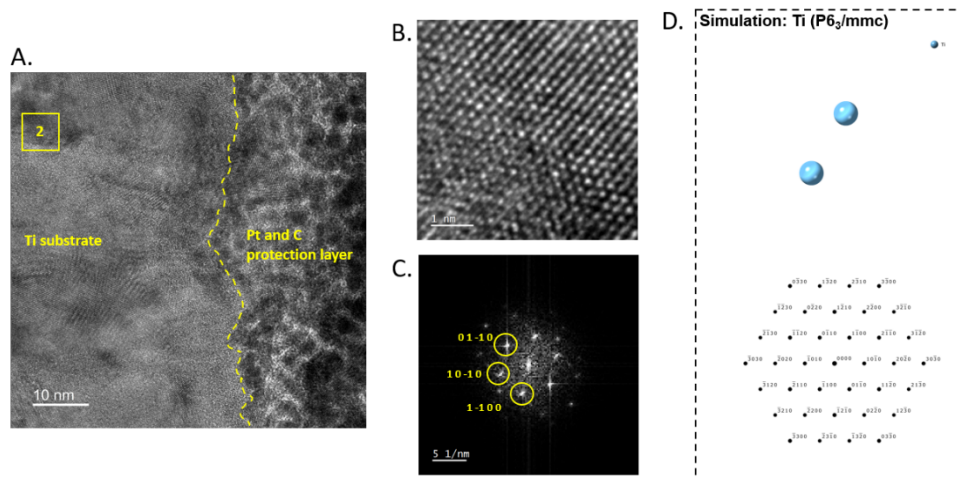

**Figure S15.** TEM characterisation of the same region but in the bulk shown in Figure 4 for the pure Ti after the AST tested with IrO<sub>x</sub>. **(a)** TEM image, **(b)** Atomic lattice information from the yellow box region (2) in (a). **(c)** the Fourier transform of (b), where the spots are indexed to alpha phase metal Ti (hexagonal close packed). **(d)** Crystalmaker atomic structure model and simulated diffraction pattern for metallic alpha phase Ti ( $P6_2/mmc$ ).

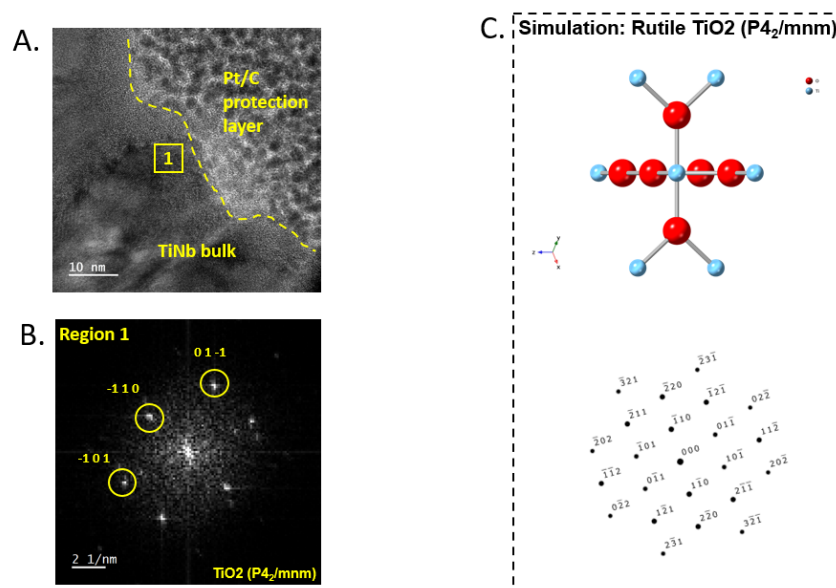

**Figure S16.** TEM characterisation of a FIB milled cross sectional specimen TiNb<sub>(50)</sub> after the AST tested with IrO<sub>x</sub>. **(a)** TEM image where the protective Pt and C coating is visible in the top right of the image. **(b)** The Fourier transform from the yellow box region (1) in (a), where the spots are indexed to rutile phase TiO<sub>2</sub>. **(c)** Crystalmaker atomic structure model and simulated diffraction pattern for rutile TiO<sub>2</sub> phase ( $P4_2/mnm$ ).

## References

- 1 W. Zhang, C. Zhu, Y. Wen, M. Wang, Z. Lu and Y. Wang, *Angew. Chem. Int. Ed.*, DOI:10.1002/anie.202418456.
- 2 G. Li, A. Priyadarsini, Z. Xie, S. Kang, Y. Liu, X. Chen, S. Kattel and J. G. Chen, *J. Am. Chem. Soc.*, 2025, **147**, 7008–7016.
- 3 J. Murawski, S. B. Scott, R. Rao, K. Rigg, C. Zalitis, J. Stevens, J. Sharman, G. Hinds and I. E. L. Stephens, *Johnson Matthey Public Limited Company*, 2024, preprint, DOI: 10.1595/205651324X17055018154113.
- 4 W. Zhu, X. Song, F. Liao, H. Huang, Q. Shao, K. Feng, Y. Zhou, M. Ma, J. Wu, H. Yang, H. Yang, M. Wang, J. Shi, J. Zhong, T. Cheng, M. Shao, Y. Liu and Z. Kang, *Nat. Commun.*, DOI:10.1038/s41467-023-41036-9.
- 5 A. Lam, Q. Sun, Z. Polus, C. Buek, K. McCrea, I. Mahoney, L. Wegge, Z. Zeng, M. McGowan, H. Yu, F. Yang, T. Valdez, M. Hamdan and Q. Jia, *ACS Catal.*, 2025, 8414–8425.
- 6 J. Ruiz Esquiú, D. J. Morgan, I. Spanos, D. G. Hewes, S. J. Freakley and G. J. Hutchings, *ACS Appl. Energy Mater.*, 2020, **3**, 800–809.
- 7 V. Pfeifer, T. E. Jones, J. J. Velasco Vélez, C. Massué, M. T. Greiner, R. Arrigo, D. Teschner, F. Girgsdies, M. Scherzer, J. Allan, M. Hashagen, G. Weinberg, S. Piccinin, M. Hävecker, A. Knop-Gericke and R. Schlögl, *Physical Chemistry Chemical Physics*, 2016, **18**, 2292–2296.
- 8 D. Hoffmeister, S. Finger, L. Fiedler, T. C. Ma, A. Körner, M. Zlatar, B. Fritsch, K. W. Bodnar, S. Carl, A. Götz, B. A. Zubiri, J. Will, E. Spiecker, S. Cherevko, A. T. S. Freiberg, K. J. J. Mayrhofer, S. Thiele, A. Hutzler and C. van Pham, *Advanced Science*, DOI:10.1002/advs.202402991.
- 9 M. Zlatar, D. Escalera-López, M. G. Rodríguez, T. Hrbek, C. Götz, R. Mary Joy, A. Savan, H. P. Tran, H. N. Nong, P. Pobodinskas, V. Briega-Martos, A. Hutzler, T. Böhm, K. Haenen, A. Ludwig, I. Khalakhan, P. Strasser and S. Cherevko, *ACS Catal.*, 2023, **13**, 15375–15392.
